# Supplementary material
Source: PubMed Central journal article supplement (PMC1959475)

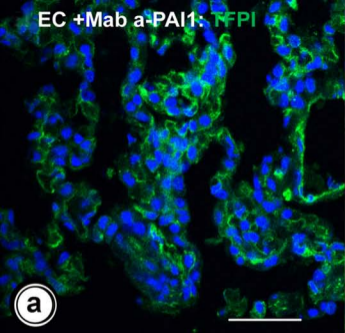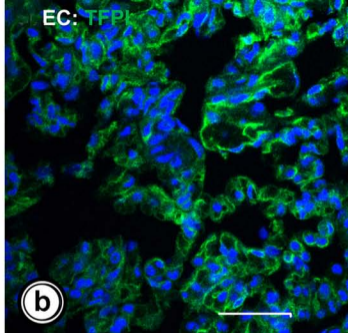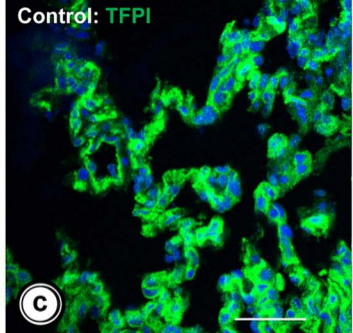

**Fig. S2**

Supplement: amjpathol_ajpath.2007.070104_2.pdf [file amjpathol_ajpath.2007.070104_2.pdf]
